# Supplementary material for: The Splicing of the Mitochondrial Calcium Uniporter Genuine Activator MICU1 Is Driven by RBFOX2 Splicing Factor during Myogenic Differentiation
Source: MDPI journal article supplement (doi:10.3390/ijms23052517), 2022-02-24
Supplement: s1 [file s1]

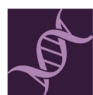

Article

# The Splicing of the Mitochondrial Calcium Uniporter Genuine Activator MICU1 Is Driven by RBFOX2 Splicing Factor during Myogenic Differentiation

Denis Vecellio Reane <sup>1</sup>, Cristina Cerqua <sup>3,4</sup>, Sabrina Sacconi <sup>5</sup>, Leonardo Salviati <sup>2,3,4</sup>, Eva Trevisson <sup>3,4,\*</sup> and Anna Raffaello <sup>1,2,\*</sup>

<sup>1</sup> Department of Biomedical Sciences, University of Padova, 35131 Padova, Italy; denis.vecellio@unipd.it

<sup>2</sup> Myology Center, University of Padova, 35131 Padova, Italy; leonardo.salviati@unipd.it

<sup>3</sup> Clinical Genetics Unit, Department of Women's and Children's Health, University of Padova, Via Giustiniani 3, 35128 Padova, Italy; cristina.cerqua@unipd.it

<sup>4</sup> Istituto di Ricerca Pediatrica—IRP, Fondazione Città della Speranza, 35127 Padova, Italy

<sup>5</sup> Centre Hospitalier Universitaire de Nice, Peripheral Nervous System and Muscle Department, Rare Neuromuscular Disease Reference Center, ERN-Euro-NMD, Université Côte d'Azur (UCA), 06103 Nice, France; sacconi@unice.fr

\* Correspondence: eva.trevisson@unipd.it (E.T.); anna.raffaello@unipd.it (A.R.)

## Supplementary Materials:

**Citation:** Vecellio Reane, D.; Cerqua, V.; Sacconi, S.; Salviati, L.; Trevisson, E.; Raffaello, A. The Splicing of the Mitochondrial Calcium Uniporter Genuine Activator MICU1 Is Driven by RBFOX2 Splicing Factor during Myogenic Differentiation. *Int. J. Mol. Sci.* **2022**, *23*, 2517. <https://doi.org/10.3390/ijms23052517>

Academic Editor: Daniel Taillandier

Received: 24 January 2022

Accepted: 22 February 2022

Published: 24 February 2022

**Publisher's Note:** MDPI stays neutral with regard to jurisdictional claims in published maps and institutional affiliations.

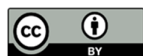

**Copyright:** © 2022 by the authors. Licensee MDPI, Basel, Switzerland. This article is an open access article distributed under the terms and conditions of the Creative Commons Attribution (CC BY) license (<http://creativecommons.org/licenses/by/4.0/>).

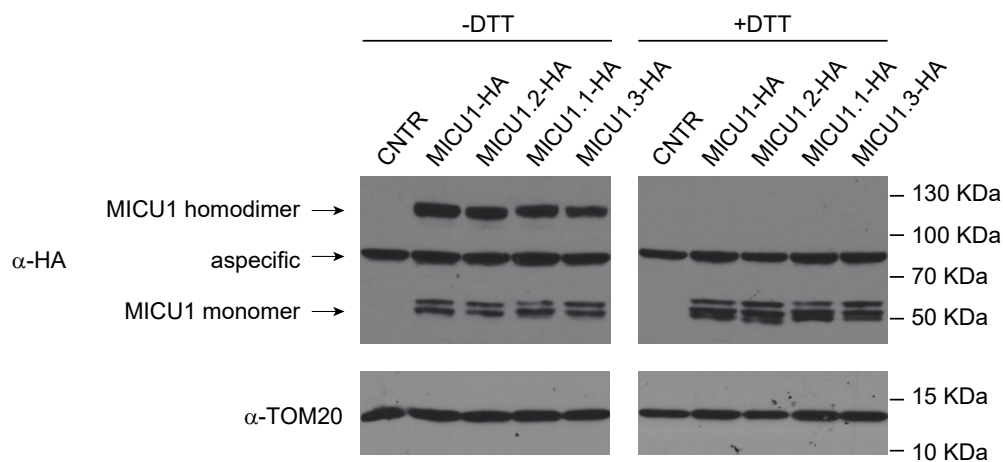

**Figure S1.** Monomer, homodimer formation and protein expression levels of human MICU1 splicing variants. HeLa cells were harvested after 24 hours of transfection with the indicated constructs, and total protein was extracted and subjected to western blotting analysis with  $\alpha$ -HA antibody. SDS-PAGE was performed both in the presence and in the absence of DTT.  $\alpha$ -TOM20 was used as loading control.

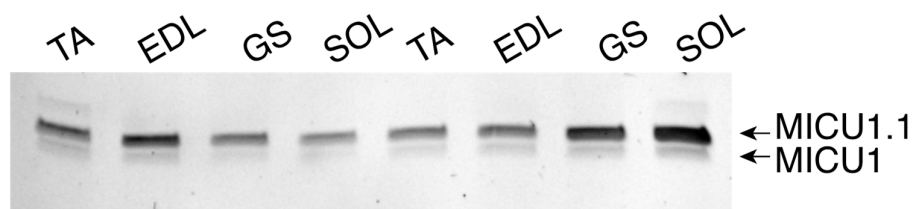

**Figure S2.** MICU1 and MICU1.1 alternative splicing regulation among different mouse muscles. Representative acrylamide gel of PCR products using primers spanning the MICU1 extra exon of cDNA of mouse muscles (TA: *Tibialis anterior*; EDL: *Extensor digitorum longus muscle*; GS: *Gastrocnemius* and SOL: *soleus*). MICU1 produces a band of 140 bp, MICU1.1 of 152 bp.

A

| Mouse              |         |         |         |                       |        |
|--------------------|---------|---------|---------|-----------------------|--------|
| Genomic Coordinate | Motif   | K-mer   | Z-score | P-value               |        |
| chr10:59756556     | cuuucu  | ucuucu  | 2.309   | $1.05 \times 10^{-2}$ | PTB    |
| chr10:59756556     | ucuu    | ucuu    | 3.259   | $5.59 \times 10^{-4}$ |        |
| chr10:59756559     | ucuu    | ucuu    | 3.268   | $5.42 \times 10^{-4}$ |        |
| chr10:59756564     | ucuu    | uauu    | 2.429   | $7.57 \times 10^{-3}$ |        |
| chr10:59756566     | cuuucu  | uuuuc   | 2.691   | $3.56 \times 10^{-3}$ |        |
| chr10:59756566     | ucuu    | uuuu    | 2.429   | $7.57 \times 10^{-3}$ |        |
| chr10:59756584     | ucuu    | ucau    | 2.152   | $1.57 \times 10^{-2}$ |        |
| chr10:59756587     | cuuucu  | uuuuc   | 1.679   | $4.66 \times 10^{-2}$ |        |
| chr10:59756664     | cucucu  | aucacu  | 2.58    | $4.94 \times 10^{-3}$ |        |
| chr10:59756666     | cucucu  | cacugu  | 2.625   | $4.33 \times 10^{-3}$ |        |
| chr10:59756668     | cuuucu  | cugucg  | 2.914   | $1.78 \times 10^{-3}$ |        |
| chr10:59756668     | cucucu  | cugucg  | 2.625   | $4.33 \times 10^{-3}$ |        |
| chr10:59756670     | cucucu  | gucgau  | 1.884   | $2.98 \times 10^{-2}$ |        |
| chr10:59756672     | cucucu  | cgauuu  | 1.884   | $2.98 \times 10^{-2}$ |        |
| chr10:59756674     | cuuucu  | auuugu  | 2.938   | $1.65 \times 10^{-3}$ |        |
| chr10:59756674     | cucucu  | auuugu  | 1.884   | $2.98 \times 10^{-2}$ |        |
| chr10:59756676     | cucucu  | uuguuu  | 1.884   | $2.98 \times 10^{-2}$ |        |
| chr10:59756677     | ucuu    | uguu    | 2.152   | $1.57 \times 10^{-2}$ |        |
| chr10:59756678     | cuuucu  | guuuuu  | 2.938   | $1.65 \times 10^{-3}$ |        |
| chr10:59756678     | cucucu  | guuuuu  | 1.884   | $2.98 \times 10^{-2}$ |        |
| chr10:59756679     | ucuu    | uuuu    | 2.152   | $1.57 \times 10^{-2}$ |        |
| chr10:59756680     | cuuucu  | uuuucu  | 3.728   | $9.65 \times 10^{-5}$ |        |
| chr10:59756680     | ucuu    | uuuu    | 2.152   | $1.57 \times 10^{-2}$ |        |
| chr10:59756680     | cucucu  | uuuucu  | 2.625   | $4.33 \times 10^{-3}$ |        |
| chr10:59756682     | cucucu  | uucuuu  | 2.625   | $4.33 \times 10^{-3}$ |        |
| chr10:59756683     | ucuu    | ucuu    | 2.714   | $3.32 \times 10^{-3}$ |        |
| chr10:59756684     | cuuucu  | cuuucu  | 3.877   | $5.29 \times 10^{-5}$ |        |
| chr10:59756684     | cucucu  | cuuucu  | 3.33    | $4.34 \times 10^{-4}$ |        |
| chr10:59756686     | cuuucu  | uucucu  | 3.309   | $4.68 \times 10^{-4}$ |        |
| chr10:59756686     | cucucu  | uucucu  | 3.33    | $4.34 \times 10^{-4}$ |        |
| chr10:59756687     | ucuu    | ucuc    | 2.152   | $1.57 \times 10^{-2}$ |        |
| chr10:59756688     | cuuucu  | cucucu  | 3.568   | $1.80 \times 10^{-4}$ |        |
| chr10:59756688     | cucucu  | cucucu  | 3.696   | $1.10 \times 10^{-4}$ |        |
| chr10:59756689     | ucuu    | ucuc    | 2.152   | $1.57 \times 10^{-2}$ |        |
| chr10:59756690     | cuuucu  | cucucc  | 3.074   | $1.06 \times 10^{-3}$ |        |
| chr10:59756690     | cucucu  | cucucc  | 3.321   | $4.48 \times 10^{-4}$ |        |
| chr10:59756691     | ucuu    | ucuc    | 2.152   | $1.57 \times 10^{-2}$ |        |
| chr10:59756692     | cucucu  | cuccuu  | 2.625   | $4.33 \times 10^{-3}$ |        |
| chr10:59756693     | ucuu    | uccu    | 2.152   | $1.57 \times 10^{-2}$ |        |
| chr10:59756694     | cuuucu  | ccuucu  | 3.407   | $3.28 \times 10^{-4}$ |        |
| chr10:59756694     | ucuu    | ccuu    | 2.152   | $1.57 \times 10^{-2}$ |        |
| chr10:59756694     | cucucu  | ccuucu  | 2.625   | $4.33 \times 10^{-3}$ |        |
| chr10:59756696     | cucucu  | uucuga  | 1.884   | $2.98 \times 10^{-2}$ |        |
| chr10:59756697     | ucuu    | ucug    | 2.152   | $1.57 \times 10^{-2}$ |        |
| chr10:59756707     | cucucu  | aguucu  | 1.884   | $2.98 \times 10^{-2}$ |        |
| chr10:59756709     | cucucu  | uucugg  | 1.875   | $3.04 \times 10^{-2}$ |        |
| chr10:59756711     | cucucu  | cuggca  | 1.821   | $3.43 \times 10^{-2}$ |        |
| chr10:59756801     | cucucu  | gccucu  | 2.027   | $2.13 \times 10^{-2}$ |        |
| chr10:59756803     | cucucu  | cucugg  | 2.027   | $2.13 \times 10^{-2}$ |        |
| chr10:59756810     | cucucu  | cucccu  | 2.58    | $4.94 \times 10^{-3}$ |        |
| chr10:59756817     | cucucu  | cucccu  | 2.652   | $4.00 \times 10^{-3}$ |        |
| chr10:59756837     | cucucu  | aucccu  | 2.098   | $1.80 \times 10^{-2}$ |        |
| chr10:59756841     | cucucu  | cugacu  | 2.107   | $1.76 \times 10^{-2}$ |        |
| chr10:59756850     | cuuucu  | auuucc  | 2.444   | $7.26 \times 10^{-3}$ |        |
| chr10:59756855     | cucucu  | cuguuu  | 1.911   | $2.80 \times 10^{-2}$ |        |
| chr10:59756858     | cuuucu  | uuuuau  | 2.185   | $1.44 \times 10^{-2}$ |        |
| chr10:59756860     | cuuucu  | uuauuc  | 2.383   | $8.59 \times 10^{-3}$ |        |
| chr10:59756860     | cucucu  | uuauuc  | 1.911   | $2.80 \times 10^{-2}$ |        |
| chr10:59756862     | cuuucu  | aucucu  | 2.333   | $9.82 \times 10^{-3}$ |        |
| chr10:59756862     | cucucu  | aucucu  | 2.277   | $1.14 \times 10^{-2}$ |        |
| chr10:59756745     | acuaay  | auuaau  | 2.793   | $2.61 \times 10^{-3}$ |        |
| chr10:59756748     | acuaay  | aaucac  | 1.728   | $4.20 \times 10^{-2}$ | OKI    |
| chr10:59756731     | wgcaugm | agcaugu | 2.592   | $4.77 \times 10^{-3}$ |        |
| chr10:59756764     | wgcaugm | uccaugu | 1.895   | $2.90 \times 10^{-2}$ |        |
| chr10:59756796     | wgcaugm | ugcaugc | 3.171   | $7.60 \times 10^{-4}$ |        |
| chr10:59756732     | gcaug   | gcaug   | 1.694   | $4.51 \times 10^{-2}$ | RBFOX1 |
| chr10:59756556     | cuuucu  | ucuucu  | 2.309   | $1.05 \times 10^{-2}$ |        |
| chr10:59756556     | cuuucu  | ucuucu  | 2.309   | $1.05 \times 10^{-2}$ | RBFOX2 |

B

| Human              |         |         |         |                       |        |
|--------------------|---------|---------|---------|-----------------------|--------|
| Genomic Coordinate | Motif   | K-mer   | Z-score | P-value               |        |
| chr10:72524892     | cuuucu  | auuucc  | 2.213   | $1.34 \times 10^{-2}$ | PTB    |
| chr10:72524866     | ucuu    | uauu    | 2.17    | $1.50 \times 10^{-2}$ |        |
| chr10:72524863     | ucuu    | uauu    | 2.161   | $1.53 \times 10^{-2}$ |        |
| chr10:72524854     | ucuu    | uuuu    | 2.17    | $1.50 \times 10^{-2}$ |        |
| chr10:72524847     | ucuu    | uguu    | 2.17    | $1.50 \times 10^{-2}$ |        |
| chr10:72524846     | cuuucu  | guuucu  | 2.2     | $1.39 \times 10^{-2}$ |        |
| chr10:72524843     | ucuu    | ucuu    | 2.723   | $3.23 \times 10^{-3}$ |        |
| chr10:72524842     | cuuucu  | cuuugu  | 2       | $2.27 \times 10^{-2}$ |        |
| chr10:72524835     | ucuu    | uauu    | 2.161   | $1.53 \times 10^{-2}$ |        |
| chr10:72524830     | ucuu    | uguu    | 2.161   | $1.53 \times 10^{-2}$ |        |
| chr10:72524828     | cuuucu  | uuuuugu | 2.213   | $1.34 \times 10^{-2}$ |        |
| chr10:72524828     | ucuu    | uuuu    | 2.143   | $1.61 \times 10^{-2}$ |        |
| chr10:72524776     | ucuu    | uguu    | 2.455   | $7.04 \times 10^{-3}$ |        |
| chr10:72524775     | cuuucu  | guuuuu  | 2.712   | $3.34 \times 10^{-3}$ |        |
| chr10:72524774     | cuuucu  | uuuuuu  | 2.812   | $2.46 \times 10^{-3}$ |        |
| chr10:72524774     | ucuu    | uuuu    | 2.455   | $7.04 \times 10^{-3}$ |        |
| chr10:72524773     | ucuu    | uuuu    | 2.455   | $7.04 \times 10^{-3}$ |        |
| chr10:72524772     | cuuucu  | uuuucu  | 3.45    | $2.80 \times 10^{-4}$ |        |
| chr10:72524772     | ucuu    | uuuu    | 2.455   | $7.04 \times 10^{-3}$ |        |
| chr10:72524769     | ucuu    | ucuu    | 3.286   | $5.08 \times 10^{-4}$ |        |
| chr10:72524768     | cuuucu  | uuuuuu  | 3.2     | $6.87 \times 10^{-4}$ |        |
| chr10:72524767     | ucuu    | uuuu    | 2.455   | $7.04 \times 10^{-3}$ |        |
| chr10:72524766     | cuuucu  | uuuucu  | 3.613   | $1.51 \times 10^{-4}$ |        |
| chr10:72524766     | ucuu    | uuuu    | 2.455   | $7.04 \times 10^{-3}$ |        |
| chr10:72524763     | ucuu    | ucuc    | 2.455   | $7.04 \times 10^{-3}$ |        |
| chr10:72524761     | ucuu    | ucau    | 2.455   | $7.04 \times 10^{-3}$ |        |
| chr10:72524758     | cuuucu  | ucuuucu | 3       | $1.35 \times 10^{-3}$ |        |
| chr10:72524758     | ucuu    | ucuu    | 3.286   | $5.08 \times 10^{-4}$ |        |
| chr10:72524755     | ucuu    | ucug    | 2.455   | $7.04 \times 10^{-3}$ |        |
| chr10:72524745     | cuuucu  | auuucu  | 3.175   | $7.49 \times 10^{-4}$ |        |
| chr10:72524742     | ucuu    | ucug    | 2.161   | $1.53 \times 10^{-2}$ |        |
| chr10:72524630     | cucucu  | cucccu  | 2.088   | $1.84 \times 10^{-2}$ |        |
| chr10:72524616     | cuuucu  | auuucg  | 2.038   | $2.08 \times 10^{-2}$ |        |
| chr10:72524607     | cuuucu  | cuguca  | 2.3     | $1.07 \times 10^{-2}$ |        |
| chr10:72524607     | cucucu  | cuguca  | 1.894   | $2.91 \times 10^{-2}$ |        |
| chr10:72524605     | cucucu  | gucacu  | 1.894   | $2.91 \times 10^{-2}$ |        |
| chr10:72524602     | ucuu    | acuu    | 2.143   | $1.61 \times 10^{-2}$ |        |
| chr10:72524853     | acuaay  | uuuaac  | 2.011   | $2.22 \times 10^{-2}$ | OKI    |
| chr10:72524732     | acuaay  | acugac  | 2.587   | $4.84 \times 10^{-3}$ |        |
| chr10:72524708     | acuaay  | auuucac | 2.554   | $5.32 \times 10^{-3}$ |        |
| chr10:72524683     | acuaay  | aguaau  | 2.5     | $6.21 \times 10^{-3}$ |        |
| chr10:72524595     | acuaay  | auuaac  | 3.109   | $9.39 \times 10^{-4}$ | RBFOX1 |
| chr10:72524721     | wgcaugm | agcaugu | 3.053   | $1.13 \times 10^{-3}$ |        |
| chr10:72524656     | wgcaugm | cgcauga | 3.474   | $2.56 \times 10^{-4}$ | RBFOX2 |
| chr10:72524649     | wgcaugm | ugcauau | 2.487   | $6.44 \times 10^{-3}$ |        |
| chr10:72524720     | gcaug   | gcaug   | 1.694   | $4.51 \times 10^{-2}$ |        |

**Figure S3.** Prediction of the binding sites of splicing factors involved in muscle differentiation in *Homo sapiens* and *Mus musculus* 300 bp surrounding the *MICU1.1* extra-exon. **(A,B)** Genomic coordinates, motives, K-mer, Z-score and P-value of the identified binding sites. **(A)** Binding sites in the mouse sequence. **(B)** Binding site in the human sequence.

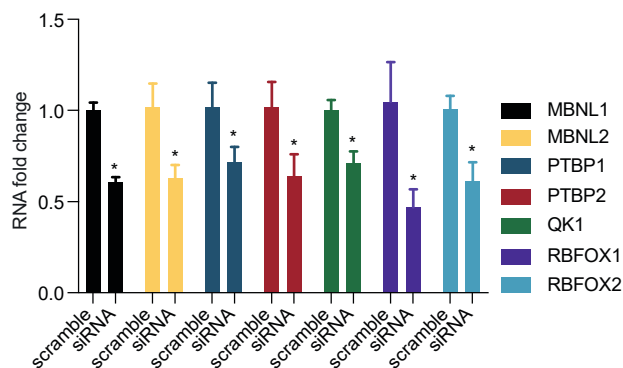

**Figure S4.** Silencing efficiency of splicing factors involved in myogenic differentiation. C2C12 myoblasts were transfected with either control scramble or the indicated siRNA. After 72 hours, cells were harvested, and expression levels were evaluated by qPCR and normalized to GAPDH. n=3. Data are expressed as mean  $\pm$  SEM. For data analysis, parametric one-way ANOVA was used with post hoc Tukey's multiple comparison test for each sample. \*  $p \leq 0.05$ .
